# Supplementary material for: Simultaneous determination of seven elemental species in estuarine waters by LC-ICP-DRC-MS
Source: Royal Society of Chemistry journal article supplement (doi:10.1039/b923343a), 2010-01-01
Supplement: b923343a.pdf [file b923343a.pdf]

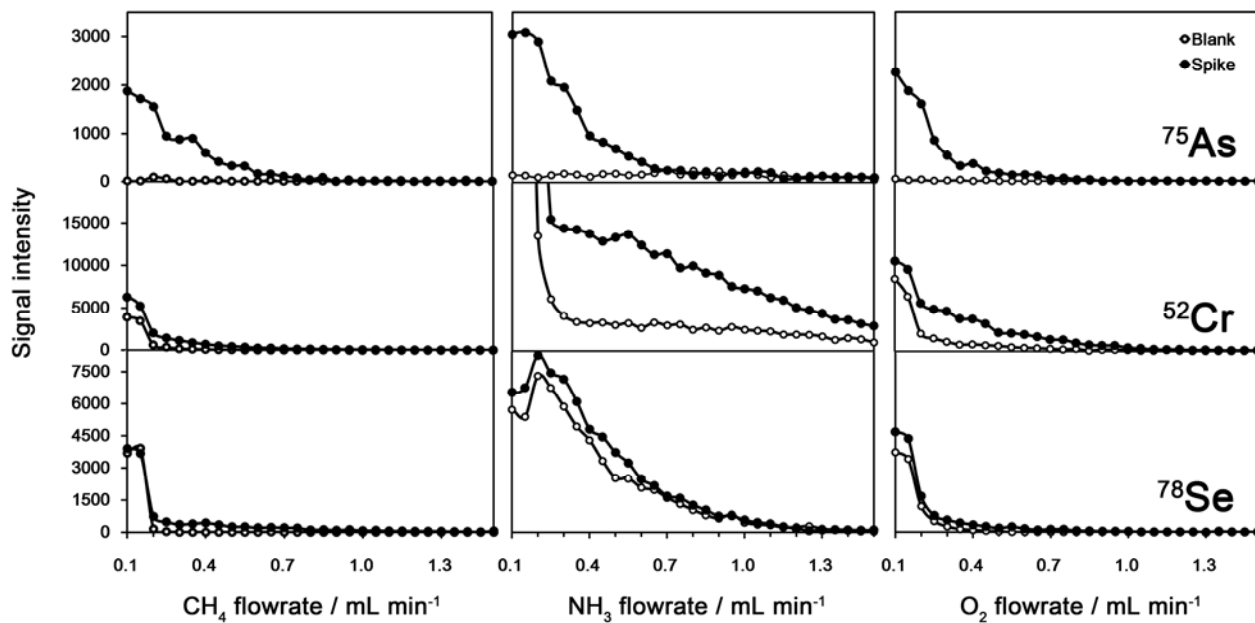

**Fig. S1** Effect of  $\text{CH}_4$ ,  $\text{NH}_3$  and  $\text{O}_2$  reaction gases and their flowrates on the  $^{75}\text{As}$ ,  $^{52}\text{Cr}$  and  $^{78}\text{Se}$  signals at  $\text{RPq}=0.4$ .

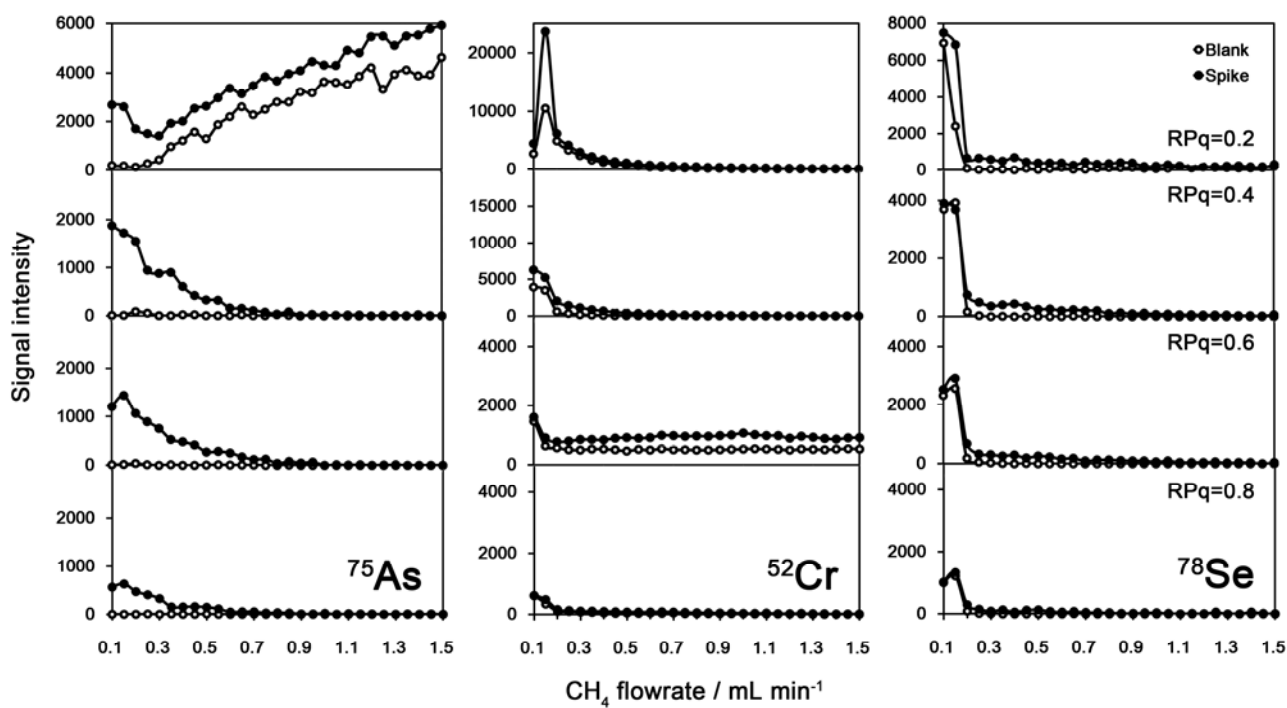

**Fig. S2** Effect of RPq values on the  $^{75}\text{As}$ ,  $^{52}\text{Cr}$ ,  $^{78}\text{Se}$  signals with  $\text{CH}_4$  as reaction gas.
